# Supplementary material
Source: PubMed Central journal article supplement (PMC4518824)

**Fig. S1. Sensory adaptation profiles of Tsr control cable mutants.**

Plasmids expressing the indicated mutant forms of Tsr were analyzed in FRET reporter strain UU2700 ( $R^+ B^+$ ). Traces show the YFP/CFP ratio over the course of serine addition at the  $K_{1/2}$  concentration previously determined for that receptor (black triangles) and subsequent serine removal (white triangles).

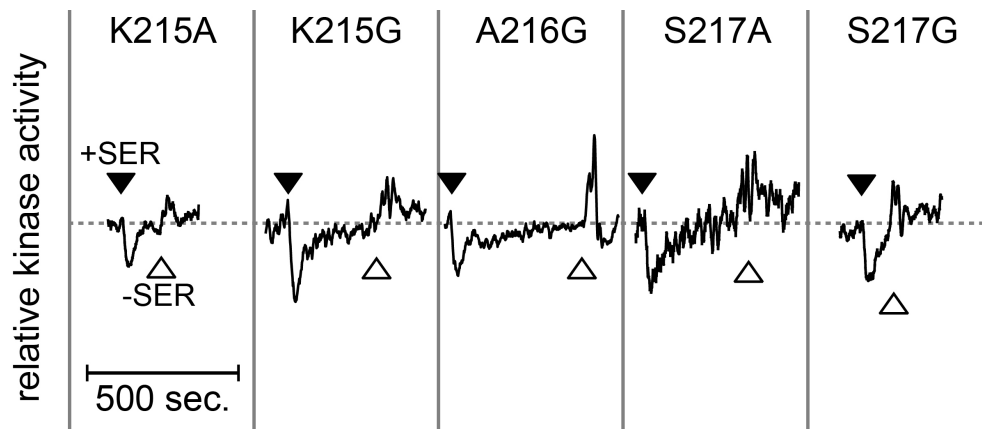

**Fig. S2. Chemotaxis phenotypes of Tsr control cable mutants.**

Plasmids expressing the indicated mutant forms of Tsr were analyzed in strain UU2612 (R<sup>+</sup> B<sup>+</sup>). Plates were photographed after incubation at 30°C for 18 hours.

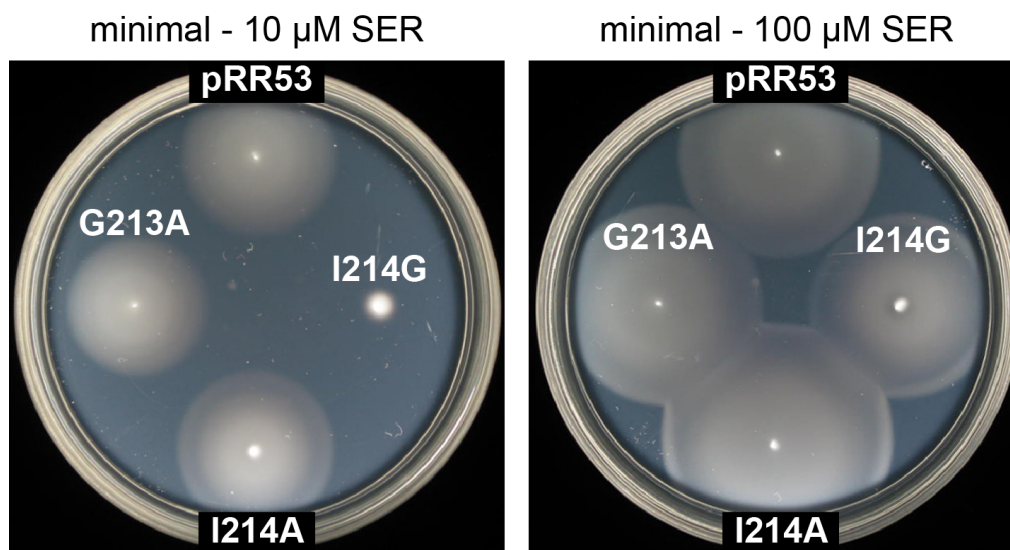

**Fig. S3. Chemotaxis phenotypes of Tsr control cable mutants.**

Plasmids expressing the indicated mutant forms of Tsr were analyzed in strain UU2612 (R<sup>+</sup> B<sup>+</sup>). Plates were photographed after incubation at 30°C for 18 hours.

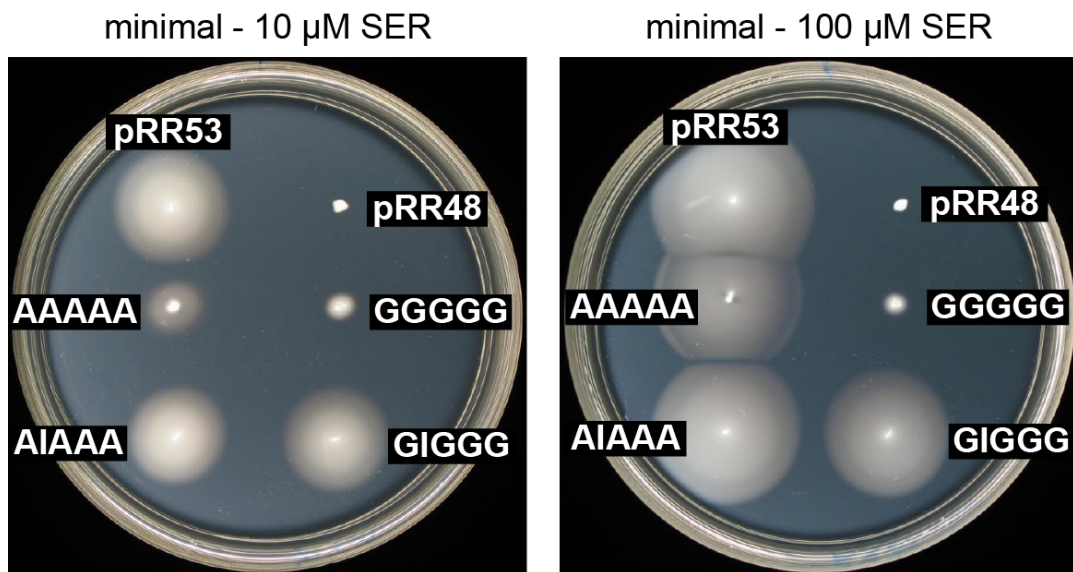

**Fig. S4. Modification patterns of Tsr control cable mutants.**

Plasmids expressing the indicated mutant forms of Tsr were transferred to strains UU2610 (R<sup>-</sup> B<sup>-</sup>), UU2611 (R<sup>-</sup> B<sup>+</sup>) and UU2632 (R<sup>+</sup> B<sup>-</sup>). Protein extracts were prepared and analyzed by SDS-PAGE and Tsr bands visualized by western blotting as detailed in Methods. Unlabeled lanes contained a mixture of three Tsr modification states as mobility standards: upper band = Tsr [EEEEEE]; middle band = Tsr [QEQEE]; lower band = Tsr [QQQQE].

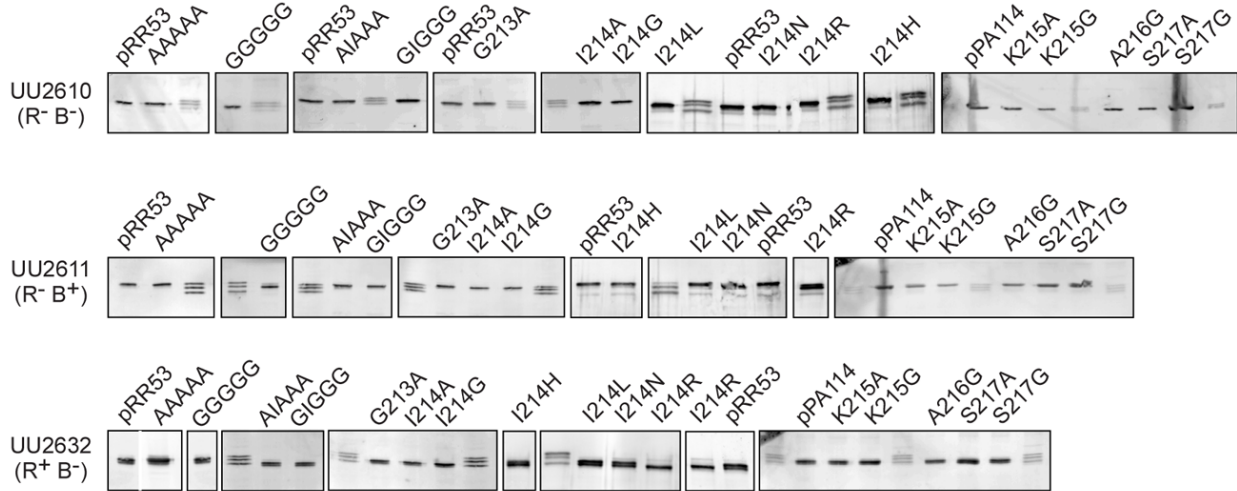

**Fig. S5. Modification patterns of Tsr control cable mutants.**

Plasmids expressing the indicated mutant forms of Tsr were transferred to strain UU2612 (R<sup>+</sup> B<sup>+</sup>). Cells were exposed (+ lanes) or not (- lanes) to serine before preparing the protein extracts. Tsr proteins were analyzed by SDS-PAGE and visualized by western blotting as detailed in Methods. Unlabeled lanes contained a mixture of three Tsr modification states as mobility standards: upper band = Tsr [EEEEEE]; middle band = Tsr [QEQEE]; lower band = Tsr [QQQQE].

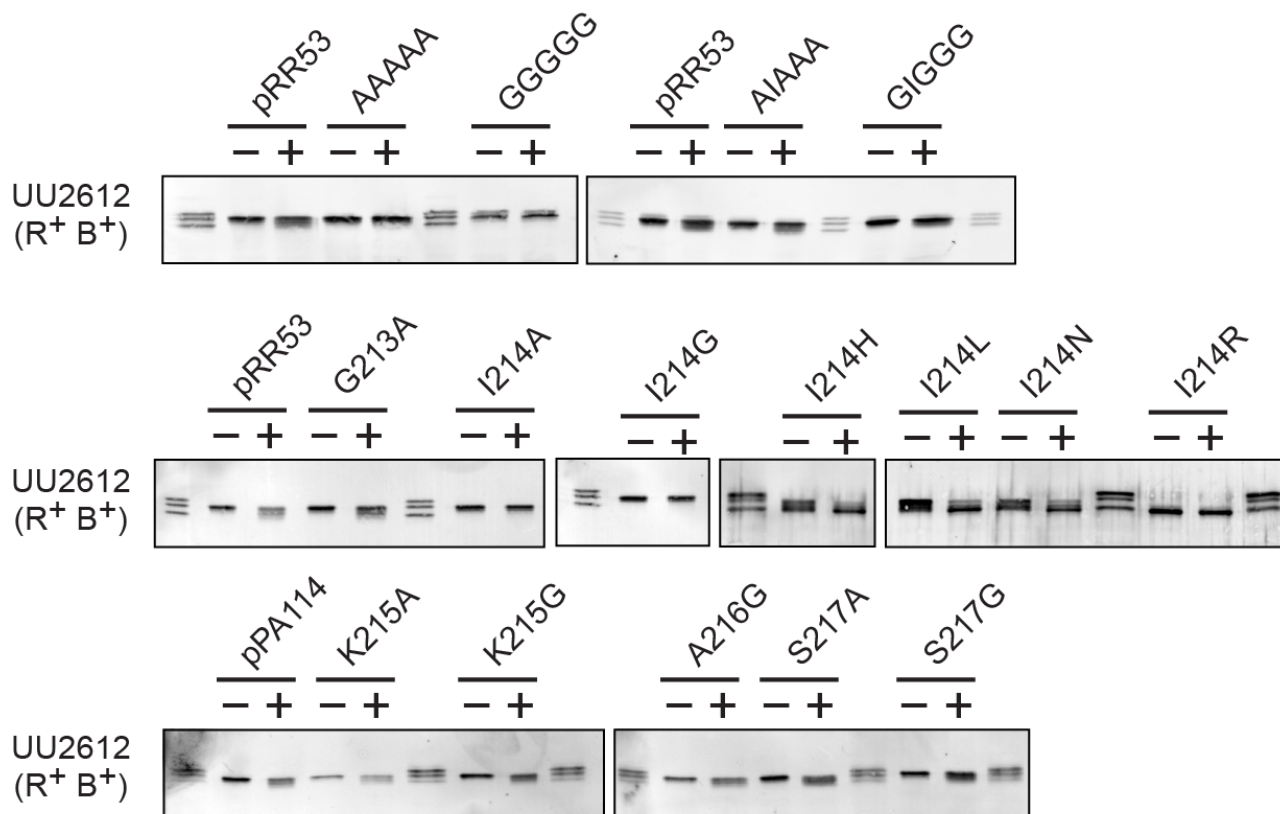

Supplement: JB.00274-15_zjb999093687so1.pdf [file JB.00274-15_zjb999093687so1.pdf]
